## Single cell in vivo brain optogenetic stimulation by two-photon excitation fluorescence transfer

Lei Tong<sup>\*1</sup>, Peng Yuan<sup>\*1,2,#</sup>, Minggang Chen<sup>3</sup>, Fuyi Chen<sup>1</sup>, Joerg Bewersdorf<sup>5,6</sup>, Z. Jimmy Zhou<sup>3,4,7</sup>, Jaime Grutzendler<sup>1,4,#</sup>

1, Department of Neurology, Yale School of Medicine, New Haven, CT, 06511

2, Current address: Department of Biology, Stanford University, Palo Alto, 94304

3, Department of Ophthalmology and Visual Science, Yale School of Medicine, New Haven, CT, 06511

4, Department of Neuroscience, Yale School of Medicine, New Haven, CT, 06511

5, Department of Cell Biology, Yale School of Medicine, New Haven, CT, 06511

6, Department of Biomedical Engineering, Yale University, New Haven, CT, 06511

7, Department of Cellular and Molecular Physiology, Yale University, New Haven, CT, 06511

<sup>\*</sup>, authors contributed equally to this work

<sup>#</sup>, corresponding author

### Abstract

Optogenetics at single-cell resolution can be achieved by two-photon stimulation; however, this requires intense or holographic illumination. We markedly improve stimulation efficiency by positioning fluorophores with high two-photon cross-sections adjacent to opsins. The two-photon-excited fluorescence matches the opsin absorbance and can stimulate opsins in a highly localized manner through efficient single-photon absorption. This indirect fluorescence transfer illumination allows experiments difficult to implement in the live brain such as all-optical neural interrogation and control of regional cerebral blood flow.

## Main

Optogenetics with light-sensitive opsins has revolutionized the field of neuroscience (1). Typical experiments involve the utilization of single-photon illumination of the brain to activate opsins such as channelrhodopsin (ChR2) and others (2). While this allows temporally precise manipulation of cell ensembles, all the cells along the conical illumination light path will be activated, reducing the spatial specificity and resulting in artificially synchronized activity patterns (3). These drawbacks limit the application of optogenetics to answer important questions involving manipulation of specific cells such as neurons and other excitable cells like vascular smooth muscle cells and astrocytes within ensembles. In order to overcome these limitations, it is desirable to achieve optogenetic stimulation with single-cell level precision. One approach is to utilize two-photon absorption, which is characterized by being limited to the immediate vicinity of the focal point, thereby achieving spatially restricted activation of opsin channels (3). Several studies have demonstrated the feasibility of this approach (4–8); however, two-photon optogenetics has relatively low efficiency in eliciting a biological response, which limits its *in vivo* applications (**Figure 1**).

One of the reasons for its low efficiency is that the two-photon effect occurs in a submicron focal volume (9). Thus, only a small patch of cell membrane is illuminated at any point in time during laser scanning, which limits the number of opsin molecules that are synchronously stimulated. This limits the ion flux necessary to induce changes in membrane potential and the resulting ability to trigger action potentials. Opsin stimulation can be improved by the use of higher laser power, but unfortunately this can also have direct effects on membrane potential and cell excitability (10–12), likely due to two-photon thermal effects (13,14), which can cause confounding opsin- or activity-independent ion channel opening. Furthermore, the use of high laser power is problematic as it may induce a variety of cell signaling changes and toxicity (15–17). An alternative to improve the efficiency of two-photon illumination is to use fast laser scanning and generate spiral paths that roughly match the cell's perimeter, which allows

simultaneous activation of a larger number of opsin channels along the cellular membrane (4,18). A related technique uses spatial light modulators to generate a hologram in the sample so that the laser can simultaneously illuminate the entire target cell (19,20) and thereby elicit a more robust cellular response. While studies have demonstrated *in vivo* manipulation of neural activity at single-cell resolution with both techniques (21,22), they require advanced optics and complex instrument operation that limit their implementation by most researchers. Thus, it would be of great utility to improve the efficiency by which opsins are stimulated with conventional two-photon illumination and thereby achieve reduced laser scanning times and power requirements.

Here we propose a robust and practical approach to achieve *in vivo* optogenetic control of single cells that we termed two-photon excitation fluorescence transfer (TEFT). Instead of directly activating the light-sensitive opsin channels on the cell membrane, this approach utilizes the two-photon laser to excite fluorophores located in the vicinity of the opsins. These fluorophores have a fluorescence emission spectrum matching the optimal (single-photon) opsin absorption spectrum and the fluorescent light, instead of the two-photon laser beam, now stimulates opsins in the target cell (**Figure 1**). Effectively, this converts two-photon stimulation into a local single-photon point source that can be efficiently used for optogenetics (**Supplementary Note1**). This approach has several advantages: in conventional two-photon optogenetics, only opsins located, at limited concentration, in a small patch of membrane defined by the width of the diffraction-limited point-spread-function (PSF) (hundreds of nanometers diameter) are activated at any point in time (18). In contrast, with the TEFT strategy, densely packed fluorescent molecules selected for a high two-photon cross section and high quantum yield (located for example in the cell cytoplasm or intravascular space, **Figures 1 and 2**) are excited throughout the volume of the PSF. Fluorescence light is emitted from the PSF volume and illuminates opsins not only within the PSF but also in the vicinity, with the intensity decaying approximately with the inverse square of the distance from the focal point. This translates into a more efficient single-photon illumination point source that can stimulate

larger areas of the adjacent cell membranes, without sacrificing the focal properties of two-photon illumination necessary for single-cell optogenetic stimulation (**Figure 1 and Supplementary Note2**).

Guided by the described TEFT optogenetics principles, we first tested the two-photon optogenetic stimulation of vascular smooth muscle cells (vSMC) in the live mouse brain to locally control cerebral blood flow (23). Optogenetic control of the brain vasculature has recently been implemented as a powerful tool for dissecting mechanisms of neurovascular coupling and its control by different vascular mural cell types (24,25). We hypothesized that TEFT may improve the efficiency and reliability of vascular optogenetics, and thus investigated this method with various combinations of opsins and intravascular fluorescent dyes. We first tested the ability to induce vessel constriction in *Cspg4-Ai32* mice, in which the perivascular vSMCs express the excitatory ChR2. In order to provide the fluorescence emission that matches the optimal absorption of ChR2, we intravascularly injected cascade blue-conjugated albumin. We then scanned a region of interest (ROI) over the selected vessel segment using the femtosecond laser tuned to 800 nm, a wavelength that is unable to directly excite ChR2 (26) and therefore cannot induce adequate vSMC contraction (**Figure 2**). As predicted, we observed a robust vessel constriction that was only elicited when we implemented the stimulation in the presence of intravascular cascade blue (**Figure 2a, Supplementary Movie 1**). In contrast, we did not observe any vessel constriction when we used an unconjugated control albumin, albumin conjugated with a dye not optimally matched to ChR2 absorption (**Supplementary Figure 1**) or when we used a 950-nm wavelength, which does not excite the cascade blue dye (**Figure 2e**). Importantly, the stimulation only induced constriction of the targeted vessel segments, while the diameter of adjacent segments or vessels in the nearby region remained unchanged (**Supplementary Figure 2**). Next, we used archaerhodopsin (Arch)-expressing mice (*Cspg4-ArchT (Ai40D)*) to induce vSMC hyperpolarization and determine the efficiency of TEFT to induce vSMC-relaxation and consequent vasodilation. To achieve the optimal single-photon activation wavelength of Arch (~545 nm, (27)), we utilized an intravascular Alexa514-conjugated albumin and 900-nm two-photon illumination.

This resulted in efficient and focal vessel dilation (**Supplementary Movie 2**), which did not occur in the absence of the intravascular dye (**Figure 2f and i**). For both ChR2 and ArchT activation, we found that many other dyes with similar emissions were capable of inducing opsin activation. For example, all three blue-emitting fluorescent dyes, Cascade-blue, Alexa 405 and AMCA (aminomethylcoumarin acetate), were able to trigger vessel contraction in Cspg4-ChR2 mice (**Figure 2e**), while the two yellow-emitting dyes, Alexa 514 and Lucifer yellow, produced vessel dilation in Cspg4-ArchT mice (**Figure 2j**). Together, these results demonstrate that the fluorescence generated from these intravascular dyes by two-photon excitation was a potent indirect light source for highly efficient and specific optogenetic control of vSMCs *in vivo*.

Having demonstrated the effectiveness of TEFT using intravascular dyes to activate vSMCs, we next explored the feasibility of applying this method to neurons in the live brain. Due to the difficulty of introducing organic fluorescent dyes into cells *in vivo*, we instead overexpressed fluorescent proteins in the target neurons. We used *in utero* electroporation of neurons in the mouse brain to first co-express the red-emitting fluorescent protein tdTomato and the opsin ReaChR (peak absorption 595 nm), as well as the calcium sensor GCaMP6 to detect neuronal activity changes. Co-expression of tdTomato, ReaChR and GCaMP6 was confirmed by observing calcium responses triggered by direct ReaChR activation upon red LED illumination. Cells that demonstrated robust responses were then targeted for two-photon stimulation. To test the feasibility of implementing TEFT in neurons, we scanned these cells by two-photon illumination of a ROI covering the entire cell body using a wavelength of 920 nm (**Figure 3a**), which is not optimal for ReaChR excitation (28). This focused scanning triggered a rapid rise in GCaMP6 fluorescence (**Figure 3b**). Furthermore, whole-cell patch-clamp recording in acute brain slices obtained from the same batch of mice showed that these calcium transients were associated with changes in membrane potential including action potentials (**Figure 3c**).

We next compared this optogenetic-induced calcium rise in cells with and without tdTomato co-expression. While two-photon scanning can directly stimulate ReaChR at relatively high powers (28), co-expression with tdTomato markedly increased the efficiency, and enabled activation at laser powers that are normally too low for ReaChR stimulation (**Figure 3d**). We observed ~50% reduction of the laser power required to reach 50% probability of activation using the TEFT method (20% rise of GCaMP6 fluorescence used as arbitrary threshold) (**Figure 3e**). Importantly, when cells were individually stimulated, we could elicit a robust calcium rise in the targeted cell, without any calcium changes in the immediately adjacent one (**Figure 3f**). Together these observations demonstrate that two-photon excitation of tdTomato can efficiently induce ReaChR activation with a high degree of spatial specificity.

In contrast to the tdTomato/ReaChR pair for TEFT optogenetic stimulation, we were not able to elicit two-photon activation of ChR2 when pairing it with genetically encoded blue fluorescent proteins or SNAPtag-targeted organic dyes co-expressed in the same neurons (**Supplementary Figure 3**). This contrasts with the highly efficient activation we observed when ChR2 in vSMCs was stimulated in the presence of blue intravascular organic dyes (**Figure 2**). As an explanation for this phenomenon, we hypothesized that the number of photons emitted by the donor fluorophores in the vicinity of opsins is a critical variable that determines their efficient activation. To better understand this relationship, we calculated the theoretical number of photons emitted after two-photon excitation of various well-known fluorescent proteins (**Supplementary Figure 4**; and **Supplementary Note 1**). With these data, we determined that the mTagBFP/ChR2 pair that we used experimentally for neurons, was not suitable for TEFT optogenetics, given that for laser powers of ~10 mW, typical of most intravital applications, the calculated emitted fluorescence of mTagBFP was only of the order of  $0.01 \text{ mW/mm}^2$ , which is two orders of magnitude lower than the reported power needed for ChR2 activation (29). In contrast, with the tdTomato/ReaChR pair, using 10 mW for two-photon illumination, yielded around  $0.12 \text{ mW/mm}^2$  (**Supplementary figure 4**), which is known to be sufficient to elicit strong ReaChR photo currents (30). One

way to overcome the low two-photon cross section of most genetically encoded blue fluorescent proteins, would be to increase their intracellular concentration to achieve greater net photon emissions. However, it is difficult to increase their intracellular concentrations beyond ~5 micromolar (31). This contrasts with the concentration of intravascular dyes that we used for stimulation of ChR2 in vSMCs (~500 micromolar), which can be further increased as needed, thereby achieving highly efficient TEFT optogenetic stimulation.

In summary, we report a novel approach to improve the limited efficiency of two-photon illumination for opsin stimulation *in vivo*. By positioning organic dyes or genetically encoded fluorescent proteins in the cytoplasm or immediate vicinity of opsins (intravascular), and using two-photon illumination to excite them, a focal source of single-photon emissions is generated, which efficiently activates adjacent opsins. The TEFT technique retains the focal illumination properties (given the rapid intensity decay as a function of distance from the single-photon light source, see **Supplementary Note 2**), which allows opsin stimulation at cellular and possibly subcellular resolution. We demonstrate that TEFT allows *in vivo* experiments otherwise not easily achievable such as targeted opsin stimulation of vSMCs and neurons with widely available standard two-photon microscopy setups. The lowered laser power requirements achieved by this method could be critical for reducing thermal injury (32) and unwanted laser-induced electrophysiological effects independent of opsin activation (10,11). TEFT can be further optimized in the future by improving the quantum yield of the paired fluorescent proteins utilized or by developing more efficient methods for targeting bright organic dyes to specific cellular compartments, thereby achieving higher concentrations, *in vivo*. Finally, this method is entirely compatible and should also improve the efficiency of other methods for two-photon optogenetic stimulation such as the use of fast spiral scanning paths (4,18) or scanless holographic approaches (19,20). Together our data demonstrates a significant improvement in the methodologies for targeted cell optogenetics stimulation that are critical for experiments requiring precise spatial and temporal single-cell stimulation for investigation of cellular physiology and neural networks *in vivo*.

## **Acknowledgement**

We thank Dr. Oscar Hernandez (Stanford University) for his guidance on the estimation of fluorescence irradiance by two-photon excitation, and Dr. Jonathan Demb (Yale University) for helpful conceptual and technical discussions. This work was supported by NIH R01NS115544 (J.G.). J.B. was additionally supported by NIH P30DK045735 (to Robert Sherwin). M.C. and Z.J.Z were additionally supported by NIH R01EY026065 (ZJZ), P30EY026878 (Yale Vision Core).



## Figure Legend

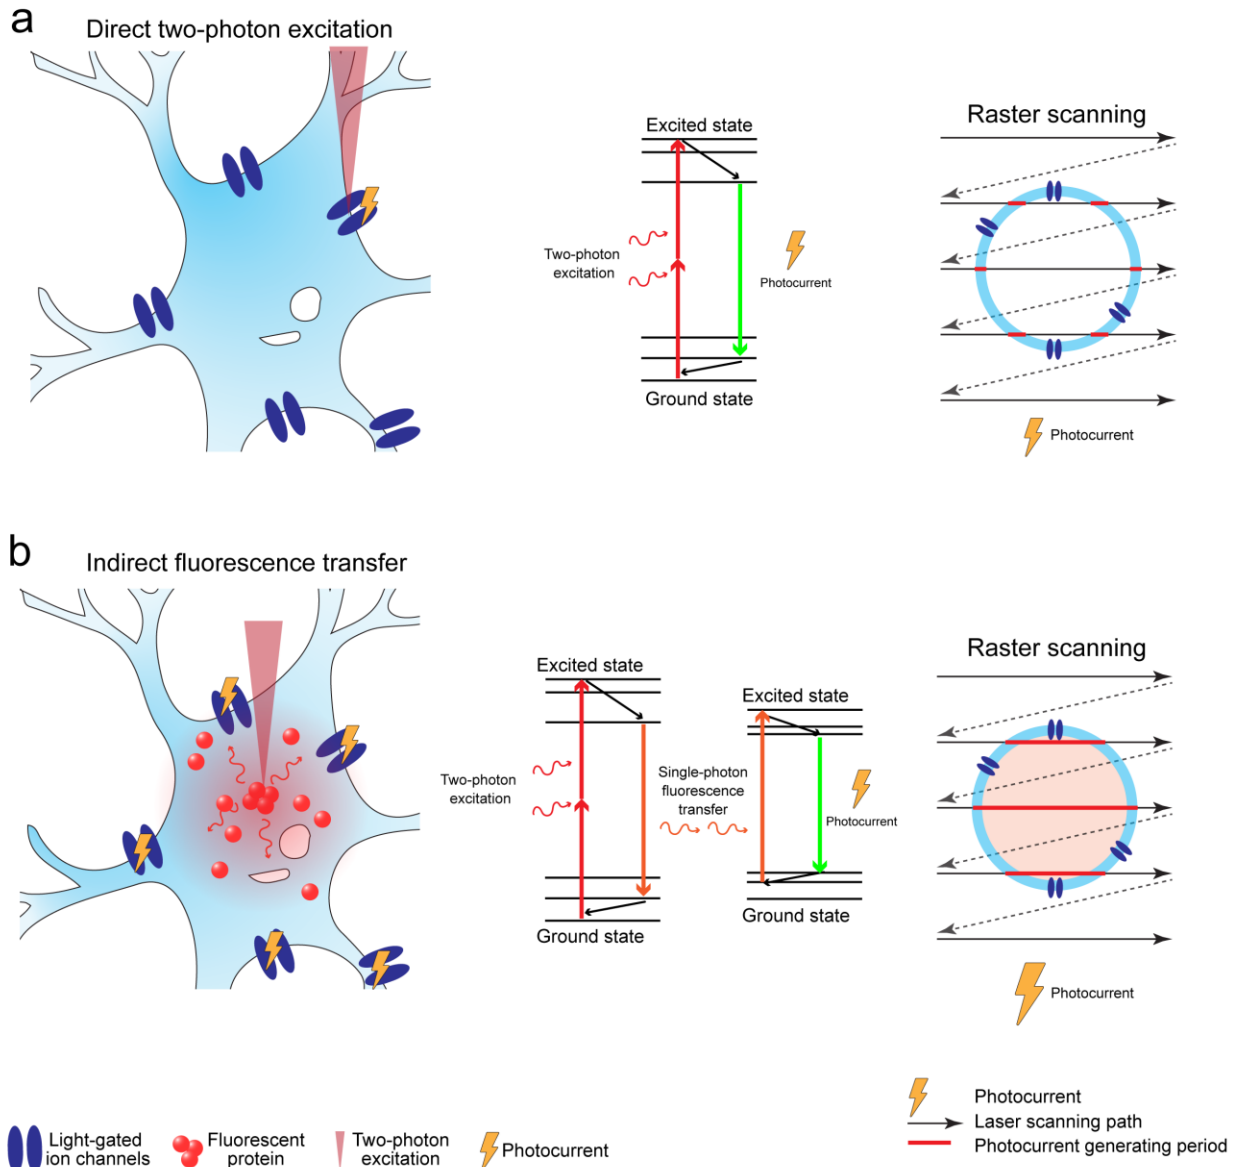

**Figure 1: Diagram depicting the principle of two-photon excitation fluorescence transfer (TEFT).** (a) Direct two-photon illumination of light-gated ion channels (opsins) induces photocurrents mainly at focal points on the cell membrane as the laser scans the field of view (left diagram). Jablonski diagram depicting standard two-photon excitation of opsins and resulting photocurrent (Middle diagram). Raster scanning showing opsin activation at site of focal membrane illumination by two-photon laser (Right diagram). (b) Expression of fluorescent proteins or presence of organic dyes in the immediate vicinity of opsins (i.e. cell cytoplasm or intravascular space) allows indirect two-photon illumination (Left diagram) by scanning the entire area and exciting fluorophores all along the path instead of just at sites of opsins on the membrane (Right diagram). The two-photon excitation of adjacent fluorophores generates single-photon emissions that are less focal and can indirectly activate the adjacent membrane opsins and generate photocurrents. This can improve the efficiency of opsin activation because it generates a larger number of exciting photons, thereby more efficiently stimulating the adjacent opsins.

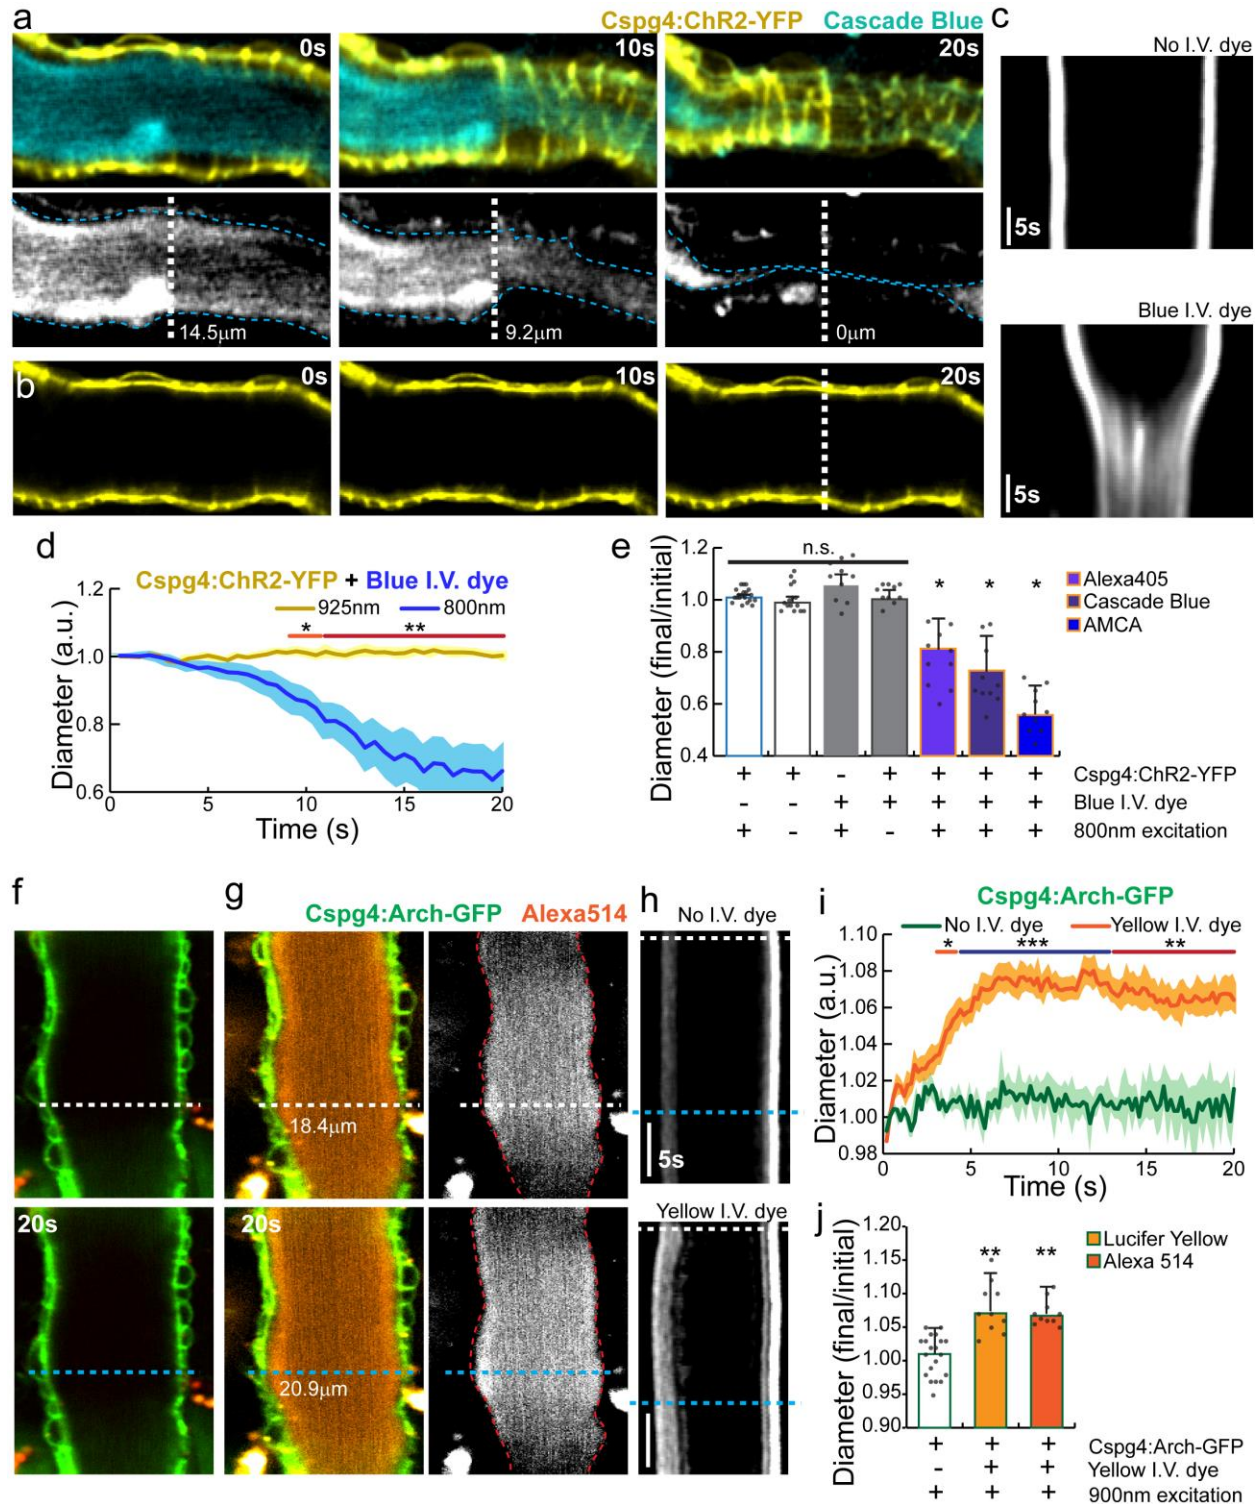

**Figure 2: Fluorescence transfer-mediated two-photon optogenetic control of vascular smooth muscle cells in vivo.** (a) Time-lapse intravital brain imaging in mice expressing ChR2 in vascular smooth muscle cells (Cspg4:ChR2-YFP) show focal vessel constriction induced by two-photon illumination of intravascular blue dye (cascade blue). Blue dashed lines (lower row) show the outlines of the intravascular space (cross-section widths indicated by white dashed lines). (b) Time-lapse images of the same vessel segment as in

**a**, without the intravascular blue dye, showing no changes in diameter with the same laser power. Scanning parameters in **a** and **b**: 25 Hz, 800 nm laser, 10  $\mu$ s dwell time, 10mW. **(c)** Vessel cross-sections during the scanning periods at the locations of white dashed lines in **a** and **b**. **(d)** Quantification of normalized vessel diameters during two-photon scanning at 800nm and 925nm wavelengths. Data are represented as mean  $\pm$  standard deviation. N=10 vessels for each group. Orange and red segments indicate statistically significant timepoints between groups (\*:  $p < 0.05$  and \*\*:  $p < 0.01$ , respectively, Student's t-test between groups for each time points, with Bonferroni's correction for multiple comparisons). **(e)** Quantifications of vessel diameters with different experimental conditions. Data are presented as mean  $\pm$  standard deviation, with individual datapoints provided (N=10 to 20 vessels per group). One sample Wilcoxon tests were used for each group to compare to 1, with additional Bonferroni's correction for multiple comparisons (\*:  $p < 0.05$ ). **(f)** Two-photon time-lapse images of vessel dilation in archaerhodopsin expressing mouse (Cspg4:ArchT-GFP). **(g)** Representative two-photon time-lapse images of the same vessel segment with yellow intravascular dye. White and blue dashed lines show site where diameter was measure overtime in **g** and **h**. Scanning parameters in **f** and **g**: 25 Hz, 900 nm laser, 10  $\mu$ s dwell time, 10mW. **(h)** Vessel cross-section line profiles depicted overtime during scanning at the locations of dashed lines in **f** and **g**. **(i)** Quantification of normalized vessel diameters with and without yellow intravascular dye. Data are represented as mean  $\pm$  standard deviation. N=10 vessels per group. Yellow, red and blue segments indicate statistically significant timepoints between groups (\*:  $p < 0.05$ ; \*\*:  $p < 0.01$  and \*\*\*:  $p < 0.001$ , respectively, Student's t-test between groups for each time point, with Bonferroni's correction for multiple comparison). **(j)** Quantification of vessel diameters with different experimental conditions. Data are presented as mean  $\pm$  standard deviation, with individual datapoints provided. N=10 to 20 vessels per group. One sample Wilcoxon tests were used for each group to compare to 1, with additional Bonferroni's correction for multiple comparison (\*\*:  $p < 0.01$ ).

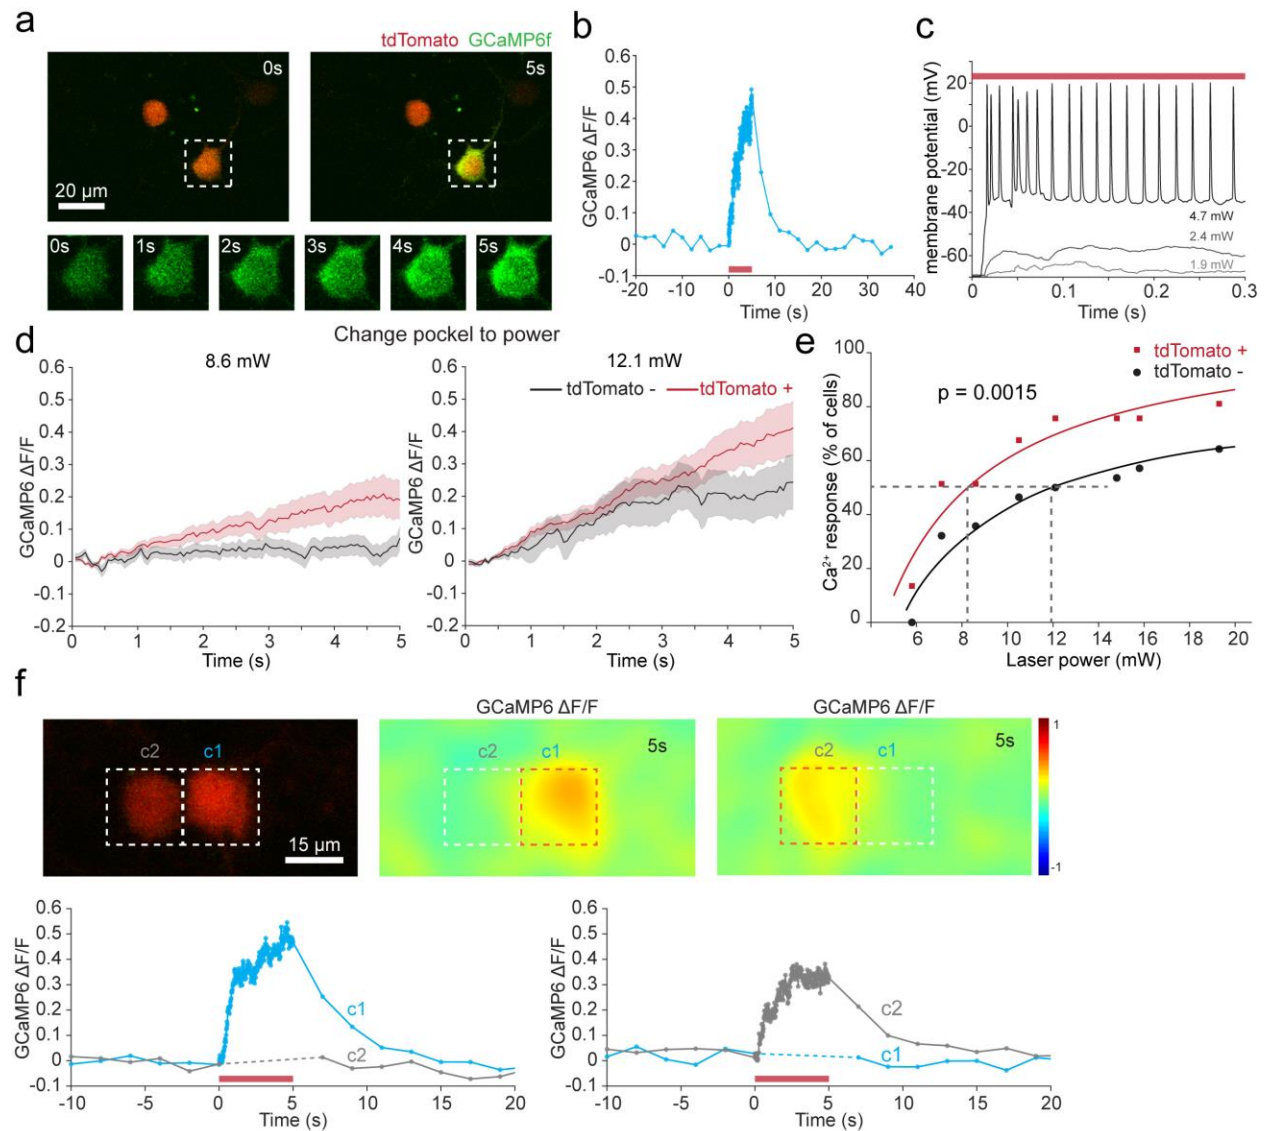

**Figure 3: In vivo optogenetics of single neurons using fluorescence transfer-mediated two-photon stimulation.** (a) Two-photon raster scanning in a live mouse brain of ROI (white dashed square) covering a neuron that is co-expressing ReaChR, GCaMP6 and tdTomato, induces robust calcium transients (ROI scan parameters: pixel size: 0.42  $\mu$ m/pixel, 50 Hz, 5 s, 920 nm laser, 4  $\mu$ s dwell time, 8.6 mW). Time-lapse images (bottom panel, green) show rapid increase in calcium levels following two-photon illumination. (b) GCaMP6 calcium response of a neuron coexpressing ReaChR, GCaMP6 and tdTomato using the same scanning parameters as in a (ROI scanning interval indicated by the orange bar). (c) Brain slice whole cell patch-clamp recording on a tdTomato and ReaChR positive neuron. The orange bar indicates ROI scanning (scanning parameters: 0.42  $\mu$ m/pixel, 20 Hz, 5 s, 920 nm laser, 4  $\mu$ s dwell time, 1.9 to 4.7 mW). (d) Comparison of two-photon optogenetics in ReaChR/GCaMP6 positive neurons with and without tdTomato expression (N=37 for tdTomato positive; N=28 for tdTomato negative). Data are represented as mean  $\pm$  standard error (\*: p<0.05, Student's t-test comparison between groups for each time point). (e) Cumulative Ca<sup>2+</sup> responses measured with GCaMP6 comparing stimulation of cells with and without expression of tdTomato using 920nm excitation. Curve fitting showed that tdTomato-expressing neurons are more efficiently activated than tdTomato-negative neurons at various laser powers (20% rise of

GCaMP6 fluorescence used as arbitrary threshold of neuronal activation) ( $p=0.0015$  comparing differences between fitted curves, see methods for statistical details). (f) Sequential two photon stimulation (920nm) of single neuron out of two adjacent ReaChR, GCaMP6 and tdTomato coexpressing cells (top-left). Heat maps of individual cell GCaMP6 responses immediately after excitation of a ROI positioned on the stimulated neuron (orange dashed box; middle and -right panels). Calcium response curves of these two neurons (bottom row. Dotted line indicates interval without scanning, see methods for detail) using stimulation parameters as in a., show that despite their proximity, the tdTomato emission within the illuminated ROI from either cell is unable to activate the immediately adjacent cell, highlighting the preservation of spatial specificity when using two photon fluorescence transfer optogenetics.

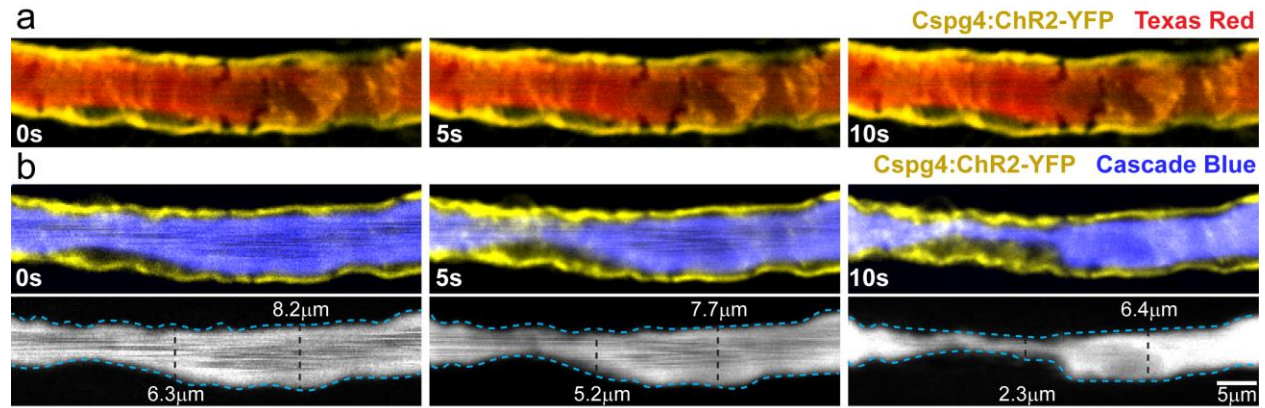

**Supplementary Figure 1: Wavelength matching is necessary for fluorescence transfer mediated two-photon optogenetic control of vSMCs.** (a) two-photon time-lapse intravital images of optogenetic stimulation in a *Cspg4-cre: Ai32* mouse with a red intravascular dye show little change in diameter. (b) The same vessel segment with a blue intravascular dye demonstrates robust constriction. Colored dashed lines in the lower row show the outlines of the intravascular space, visualized with the dye channel. Cross-section widths at the locations of the black dashed lines are labeled.

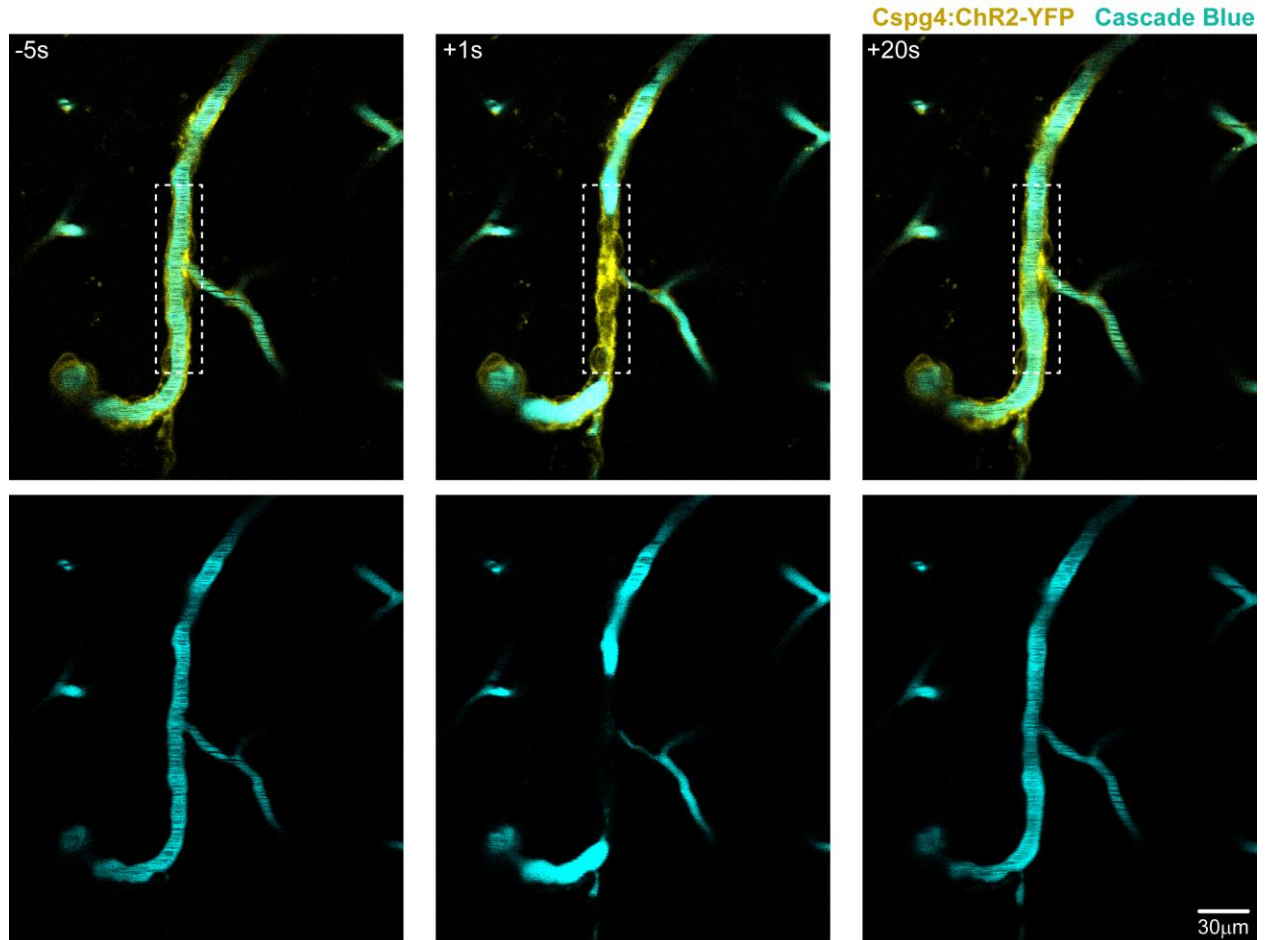

**Supplementary Figure 2: Spatial specificity of fluorescence transfer mediated two-photon optogenetic control of vSMCs.** Two-photon time-lapse images of vessel constriction in a *Cspg4-cre:Ai32* mouse with intravascular blue dye. White dashed boxes indicated the stimulation scanning region of interest. Notice the restriction of the constricted area to the illumination ROI only.

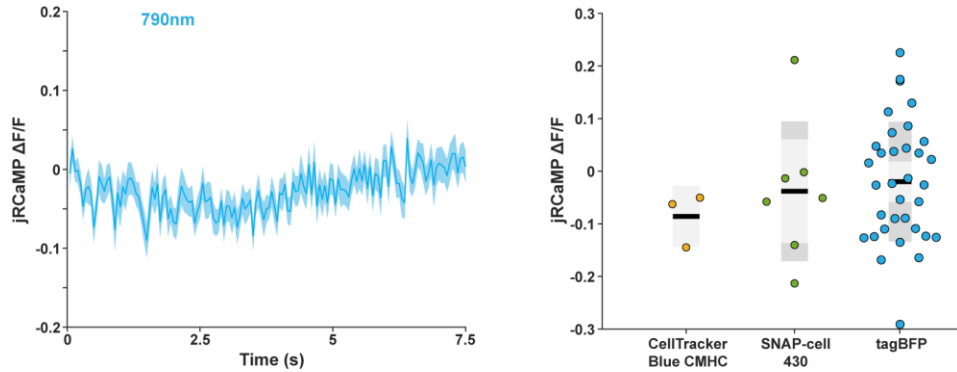

**Supplementary Figure 3: Fluorescence transfer mediated two-photon optogenetics of Chr2 in neurons using blue fluorescent proteins and dyes is ineffective.** (a) Calcium response of ChR2, jRCaMP and tagBFP positive neurons (N=34) shows no response when scanned with two-photon (780 nm for tagBFP excitation, 1045 nm for jRCaMP calcium imaging, 4  $\mu$ s dwell time, ~15 mW); ROI scanning (48x48 pixels, 20 Hz, for 5 s) performed on the neuron soma. Data are represented as mean  $\pm$  standard error. (b) Quantification of calcium response during two-photon scanning (similar to a) with CellTracker Blue CMHC, SNAP-cell 430, and tagBFP in ChR2 and jRCaMP co-expressing neurons (N=3, N=7, N=34). Data are represented as mean  $\pm$  standard error. An important note is that none of the organic dyes or SNAP-cell 430 labeling strategies achieved sufficiently bright labeling in vivo, potentially limiting the overall stimulation efficiency.



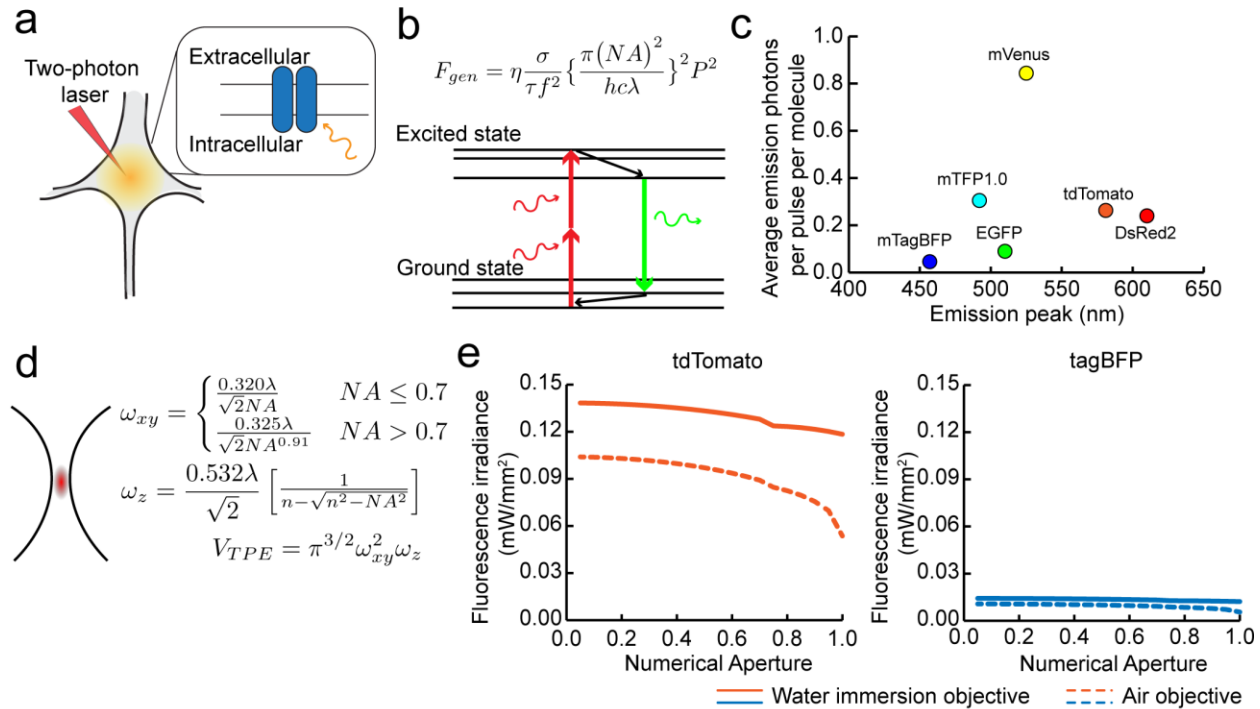

**Supplementary Figure 4: Theoretical estimation of the fluorescence irradiance with two-photon excitation using different fluorophores.** (a) Schematic diagram of fluorescence transfer mediated two-photon optogenetics. Two-photon excitation generates fluorescence that can be absorbed by opsins expressed on the cell membrane. Two prerequisites for efficient fluorescence transfer optogenetics: 1, matching the spectrum between fluorophore emission and opsin absorption; and 2, sufficient irradiance of the fluorescence to generate photocurrents. (b) The Jablonski diagram for the principle of two-photon excitation, and equations describing the photons generated per fluorophore per pulse (modified from (9)).  $\eta$ : fluorophore quantum efficiency;  $\sigma$ : two-photon absorption cross-section;  $\tau$ : laser pulse duration;  $f$ : laser pulse repetition rate;  $NA$ : Objective numeric aperture;  $h$ : Planck's constant;  $c$ : Speed of light;  $\lambda$ : Excitation wavelength;  $P$ : Average excitation power). (c) Theoretical calculations of two-photon fluorescence photon generation for selected fluorescent proteins using the equation in b. Two-photon excitation wavelengths used in calculations corresponded to the peak cross-section of each protein. Laser power was kept at 10 mW with a 1.0 numerical aperture lens. (d) Equations estimating two-photon focal volume (modified from(33))  $\lambda$ : Excitation wavelength;  $NA$ : Objective numeric aperture;  $n$ : refractive index). (e) Estimations of two-photon excitation fluorescence irradiance of tdTomato and tagBFP, with various objectives (air or water immersion, numerical aperture from 0.05-1.0). Laser power was kept at 10 mW, fluorescent protein concentration was set at 5  $\mu$ M, and a target cell was 10  $\mu$ m in diameter. Based on these calculations the blue-emitting proteins have a theoretical low efficiency for exciting the opsins, consistent with our experimental data.

**Supplementary Movie 1: Fluorescence transfer-mediated two-photon optogenetic activation of ChR2 in vascular smooth muscle cells leads to vessel constriction.** Time-lapse videos of the same vessel segment in a Cspg4-Ai32 mouse with (right panel, 800nm excitation) and without (left panel, 925nm excitation) the excitation of the intravascular blue-emitting dye. Scanning parameters in both: 25 Hz, 10  $\mu$ s dwell time, 10mW laser power.

**Supplementary Movie 2: Fluorescence transfer-mediated two-photon optogenetic activation of ArchT in vascular smooth muscle cells leads to vessel dilation.** Time-lapse videos of the same vessel segment in a Cspg4-Ai40D mouse with (right panel, 900nm excitation) and without (left panel, 930nm excitation) the excitation of the intravascular yellow-emitting dye. Scanning parameters in both: 25 Hz, 10  $\mu$ s dwell time, 10mW laser power.

## Materials and Methods

### Mice

All rodent procedures were approved by the Yale University Institutional Animal Care and Use Committee. For vascular studies, transgenic mice that express the Cre recombinase under the mural cell NG2 (Cspg4) promoter, and reporter lines with cre-dependent channelrhodopsin-2 (Ai32) or Archaelrhodopsin-3 (Ai40D) were purchased from The Jackson Laboratory (JAX# 008533, JAX# 021188, JAX# 012569). Cre-expressing strains were crossbred with the reporter strains and the offspring were used for all experiments. For neuronal studies, wild type mice were used for electroporation of various constructs (JAX# 000651). For all experiments, 2-3-month-old mice from both sexes were used.

### Reagents

Purified albumin (Sigma-Aldrich, 05470) was used for fluorescent dye conjugation. Reactive esters were used for labeling (Thermo Fisher Scientific, C-2284, A6118, A30000, L-1338) according to the manufacturer's instruction. The labeled albumin was diluted so that 5mg reactive dyes constituted 1mL of injection stock. 100 $\mu$ l of labeled albumin was injected intravenously before imaging, final dye concentration in blood was estimated to be  $\sim$ 0.5mM. In all conjugations, albumin was used at concentrations greater than the number of fluorophores to eliminate the need for free fluorophore purification.

To express constructs by in Utero electroporation we obtained and modified the following plasmid constructs from Addgene: CAG-tdTomato, CAG-ReaChR (#50954), Syn-GCaMP6f (#100837), CAG-tagBFP (#49151), Syn-ChR2 (#58880), CAG-jRCaMP (#61562). See **Supplementary note 3** for maps of modified plasmids.

### In utero electroporation

In utero electroporation was done as previously described (34). Briefly, Plasmids were used at the final concentration of 1.0  $\mu$ g/ $\mu$ l (for each plasmid), mixed with 2 mg/ml Fast Green for visualization during plasmid injection and electroporation. Electroporation was performed around embryonic day 13 to 15 (E13 to E15). Mice were anesthetized with ketamine/xylazine (100mg/kg and 10mg/kg i.p.). Buprenorphine was administered (i.p.) every 12 hours for 2 more days following surgery. After exposing the uterine horns,  $\sim$ 1  $\mu$ l of plasmid mixture was pressure injected into the lateral ventricle of each embryo via a pulled glass microelectrode (tip size 10 $\sim$ 20  $\mu$ m) using Picospritzer II (General Valve, 20 psi). 50 V current pulses generated by a BTX 8300 pulse generator (BTX Harvard Apparatus) were used for electroporation. Mice were allowed to age to 1 month prior to utilization in all experiments.

### Craniotomy surgery, window implantation and in vivo two-photon imaging

Mice were anesthetized with an intraperitoneal injection of Ketamine/Xylazine mixture, with final concentration of 100mg/kg and 10mg/kg, respectively. The status of anesthesia was assessed periodically with hind paw pinch. The mouse was head-fixed to a custom-made headplate by gluing the skull to it. A craniotomy of about 4mm diameter was made (AP -1.5mm, ML 2.0 mm) with a dental drill, with dura mater carefully removed. A coverslip was put to cover the craniotomy opening and secured with cyanoacrylate glue. The mouse was kept anesthetized during subsequent imaging sessions, and immediately euthanized after finalizing the experiment.

Two-photon imaging was carried out with a commercial system (Bruker Ultima Investigator), controlled through Prairie View software. A tunable Ti:Sapphire laser was used to generate two-photon excitation with its wavelength and mode-locking tuned through MaiTai software. In the case of RCaMP imaging, a 1045nm fixed wavelength laser (MaiTai InSight X3) was used. A pockel cell was used to modulate laser power; and the laser power on the sample was measured with a power meter (Thorlabs PM100D). The point scanning was achieved by galvanometer scanners with various dwell times. The full frame rate was kept at 0.5 Hz, and for stimulation, the scanning within regions of interests (ROIs) was at 20 Hz or 50 Hz frequencies. During ROI scanning, the regions outside the ROI were not scanned nor imaged (represented by the dashed portion of the GCaMP6 response curved in **figure 3f**). Fluorescence emission was collected with gallium arsenide phosphide photo-multiplier tubes. A 20x water immersion 1.0 numerical aperture objective (Zeiss) and a 10x air 0.4 numerical aperture objective (Leica) were used for most experiments.

### Single cell patch clamp and two-photon optogenetics

Acute brain slices of the in utero electroporated mice (P30-P40) were prepared following a N-methyl-D-glucamine (NMDG) protective recovery method (35). Whole cell patch clamp and two-photon optogenetics were then performed in slices in an ASCF containing (in mM) 120 NaCl, 3.1 KCl, 1.1 CaCl<sub>2</sub>, 1.2 MgCl<sub>2</sub>, 1.25 MgSO<sub>4</sub>, 26 NaHCO<sub>3</sub>, 0.5 L-glutamine, 0.1 ascorbic acid, 0.1 Na-pyruvate, and 20 glucose; saturated with 95% O<sub>2</sub>–5% CO<sub>2</sub> at 35°C. To target fluorescent cells, we used a two-photon microscope system (Ultima; Prairie Technologies) equipped with a Ti:Sapphire pulsed laser (MaiTai), configured on an Olympus upright microscope (BX51WI) with a 20x, 0.5 NA objective lens (LUMPlanFL/IR) and a 60x, 1.0 NA objective lens (LUMPLANFL/IR). Cells were patched under 60x objective lens with pipette solutions as follows (in mM): (1) for voltage clamp, 105 CsMeSO<sub>4</sub>, 0.5 CaCl<sub>2</sub>, 10 HEPES, 5 EGTA, 5 Na<sub>2</sub>-phosphocreatine, 2 ATP-Mg, 0.5 GTP-2Na, 2 ascorbic acid, and 8 QX314-Cl (pH 7.2), with 20–30 CsOH; (2) for current clamp, 105 potassium gluconate, 5 KCl, 0.5 CaCl<sub>2</sub>, 2 MgCl<sub>2</sub>, 5 EGTA, 10 HEPES, 5 Na<sub>2</sub>-phosphocreatine, 2 ATP-2Na, 0.5 GTP-2Na, and 2 ascorbic acid (pH 7.2) with 5 NaOH and 15 KOH. Liquid junction potential was calculated with pCLAMP software and corrected (Molecular Devices, Union City, CA). Once whole cell patch clamp was achieved, 20x objective lens was switched for two-photon optogenetics. A single ROI (48 x 48 pixel, 10 x 10 μm) including only the cell soma was chosen for raster scan, with 920nm wavelength, 12 μs dwell time, and laser intensity less than 20 mW, which shows no clear photo damage to cell membranes. An external voltage was used to trigger the two-photon image scan, so that the timing of laser scanning and cell voltage/current can be accurately matched for later analysis.

### Statistics

Statistical analyses were carried out using GraphPad Prism (8.4.1). Data were presented in mean ± standard deviation in **Figure 2d, 2e, 2i** and **2j**, and in mean ± standard error in **Figure 3d**. For comparing normalized vessel diameter time-lapse traces (**Figure 2d** and **2i**), Student's t-test was performed with each timepoint, with Bonferroni correction for multiple comparison. For comparing the two-photon mediated vessel motility in different conditions (**Figure 2e** and **2j**), one-sample Wilcoxon tests were used for each group to compare to a value of 1, with additional Bonferroni's correction for multiple comparison. For comparing the efficacy of neuronal optogenetics with and without fluorescence transfer (**Figure 3e**), we fit the response probability from each group to the following exponential equation:  $Y = 1 - \exp(-K*(X-L))$ , in which the parameter L indicates the minimal power to elicit calcium responses and K indicates the change rate of the curve. Extra sum-of-squares F test was used to determine whether two sets of parameters were statistically different.

## References

1. Boyden ES, Zhang F, Bamberg E, Nagel G, Deisseroth K. Millisecond-timescale, genetically targeted optical control of neural activity. *Nat Neurosci.* 2005 Sep;8(9):1263–1268.
2. Deisseroth K. Optogenetics. *Nat Methods.* 2011 Jan;8(1):26–29.
3. Oron D, Papagiakoumou E, Anselmi F, Emiliani V. Two-photon optogenetics. *Prog Brain Res.* 2012;196:119–143.
4. Prakash R, Yizhar O, Grewe B, Ramakrishnan C, Wang N, Goshen I, et al. Two-photon optogenetic toolbox for fast inhibition, excitation and bistable modulation. *Nat Methods.* 2012 Dec;9(12):1171–1179.
5. Mardinly AR, Oldenburg IA, Pégard NC, Sridharan S, Lyall EH, Chesnov K, et al. Precise multimodal optical control of neural ensemble activity. *Nat Neurosci.* 2018 Apr 30;21(6):881–893.
6. Carrillo-Reid L, Yang W, Bando Y, Peterka DS, Yuste R. Imprinting and recalling cortical ensembles. *Science.* 2016 Aug 12;353(6300):691–694.
7. Shemesh OA, Tanese D, Zampini V, Linghu C, Piatkevich K, Ronzitti E, et al. Temporally precise single-cell-resolution optogenetics. *Nat Neurosci.* 2017 Dec;20(12):1796–1806.
8. Zhang Z, Russell LE, Packer AM, Gauld OM, Häusser M. Closed-loop all-optical interrogation of neural circuits in vivo. *Nat Methods.* 2018 Nov 12;15(12):1037–1040.
9. Denk W, Strickler JH, Webb WW. Two-photon laser scanning fluorescence microscopy. *Science.* 1990 Apr 6;248(4951):73–76.
10. Walsh AJ, Tolstykh GP, Martens S, Ibey BL, Beier HT. Action potential block in neurons by infrared light. *Neurophotonics.* 2016 Oct;3(4):040501.
11. Wells J, Kao C, Mariappan K, Albea J, Jansen ED, Konrad P, et al. Optical stimulation of neural tissue in vivo. *Opt Lett.* 2005 Mar 1;30(5):504–506.
12. Rungta RL, Osmanski B-F, Boido D, Tanter M, Charpak S. Light controls cerebral blood flow in naive animals. *Nat Commun.* 2017 Jan 31;8:14191.
13. Picot A, Dominguez S, Liu C, Chen I-W, Tanese D, Ronzitti E, et al. Temperature Rise under Two-Photon Optogenetic Brain Stimulation. *Cell Rep.* 2018 Jul 31;24(5):1243–1253.e5.
14. Owen SF, Liu MH, Kreitzer AC. Thermal constraints on in vivo optogenetic manipulations. *Nat Neurosci.* 2019 Jun 17;22(7):1061–1065.
15. Davalos D, Grutzendler J, Yang G, Kim JV, Zuo Y, Jung S, et al. ATP mediates rapid microglial response to local brain injury in vivo. *Nat Neurosci.* 2005 Jun;8(6):752–758.
16. Zeng X-C, Bhasin S, Wu X, Lee J-G, Maffi S, Nichols CJ, et al. Hsp70 dynamics in vivo: effect of heat shock and protein aggregation. *J Cell Sci.* 2004 Oct 1;117(Pt 21):4991–5000.

17. Duke CG, Savell KE, Tuscher JJ, Phillips RA, Day JJ. Blue Light-Induced Gene Expression Alterations in Cultured Neurons Are the Result of Phototoxic Interactions with Neuronal Culture Media. *Eneuro*. 2020 Jan 6;7(1).
18. Rickgauer JP, Tank DW. Two-photon excitation of channelrhodopsin-2 at saturation. *Proc Natl Acad Sci U S A*. 2009 Sep 1;106(35):15025–15030.
19. Hernandez O, Papagiakoumou E, Tanese D, Fidelin K, Wyart C, Emiliani V. Three-dimensional spatiotemporal focusing of holographic patterns. *Nat Commun*. 2016 Jun 16;7:11928.
20. Pégard NC, Mardinly AR, Oldenburg IA, Sridharan S, Waller L, Adesnik H. Three-dimensional scanless holographic optogenetics with temporal focusing (3D-SHOT). *Nat Commun*. 2017 Oct 31;8(1):1228.
21. Carrillo-Reid L, Han S, Yang W, Akrouh A, Yuste R. Controlling visually guided behavior by holographic recalling of cortical ensembles. *Cell*. 2019 Jul 11;178(2):447–457.e5.
22. Marshel JH, Kim YS, Machado TA, Quirin S, Benson B, Kadmon J, et al. Cortical layer-specific critical dynamics triggering perception. *Science*. 2019 Aug 9;365(6453).
23. Webb RC. Smooth muscle contraction and relaxation. *Adv Physiol Educ*. 2003 Dec;27(1-4):201–206.
24. Hill RA, Tong L, Yuan P, Murikinati S, Gupta S, Grutzendler J. Regional blood flow in the normal and ischemic brain is controlled by arteriolar smooth muscle cell contractility and not by capillary pericytes. *Neuron*. 2015 Jul 1;87(1):95–110.
25. Mateo C, Knutsen PM, Tsai PS, Shih AY, Kleinfeld D. Entrainment of Arteriole Vasomotor Fluctuations by Neural Activity Is a Basis of Blood-Oxygenation-Level-Dependent “Resting-State” Connectivity. *Neuron*. 2017 Nov 15;96(4):936–948.e3.
26. Mohanty SK, Reinscheid RK, Liu X, Okamura N, Krasieva TB, Berns MW. In-depth activation of channelrhodopsin 2-sensitized excitable cells with high spatial resolution using two-photon excitation with a near-infrared laser microbeam. *Biophys J*. 2008 Oct;95(8):3916–3926.
27. Han X, Chow BY, Zhou H, Klapoetke NC, Chuong A, Rajimehr R, et al. A high-light sensitivity optical neural silencer: development and application to optogenetic control of non-human primate cortex. *Front Syst Neurosci*. 2011 Apr 13;5:18.
28. Chaigneau E, Ronzitti E, Gajowa MA, Soler-Llavina GJ, Tanese D, Brureau AYB, et al. Two-Photon Holographic Stimulation of ReaChR. *Front Cell Neurosci*. 2016 Oct 18;10:234.
29. Lin JY. A user’s guide to channelrhodopsin variants: features, limitations and future developments. *Exp Physiol*. 2011 Jan;96(1):19–25.
30. Lin JY, Knutsen PM, Muller A, Kleinfeld D, Tsien RY. ReaChR: a red-shifted variant of channelrhodopsin enables deep transcranial optogenetic excitation. *Nat Neurosci*. 2013 Oct;16(10):1499–1508.

31. Cherkas V, Grebenyuk S, Osypenko D, Dovgan AV, Grushevskiy EO, Yedutenko M, et al. Measurement of intracellular concentration of fluorescently-labeled targets in living cells. *PLoS ONE*. 2018 Apr 25;13(4):e0194031.
32. Yang W, Carrillo-Reid L, Bando Y, Peterka DS, Yuste R. Simultaneous two-photon imaging and two-photon optogenetics of cortical circuits in three dimensions. *elife*. 2018 Feb 7;7.
33. Zipfel WR, Williams RM, Webb WW. Nonlinear magic: multiphoton microscopy in the biosciences. *Nat Biotechnol*. 2003 Nov;21(11):1369–1377.
34. Chen F, LoTurco J. A method for stable transgenesis of radial glia lineage in rat neocortex by piggyBac mediated transposition. *J Neurosci Methods*. 2012 Jun 15;207(2):172–180.
35. Ting JT, Lee BR, Chong P, Soler-Llavina G, Cobbs C, Koch C, et al. Preparation of Acute Brain Slices Using an Optimized N-Methyl-D-glucamine Protective Recovery Method. *J Vis Exp*. 2018 Feb 26;(132).

## Supplementary Note 1:

According to reference (1) (neglecting fluorescent molecule saturation effects and assuming the paraxial approximation) the number of fluorescent photons generated per fluorophore per pulse can be estimated as:

$$F_{gen} = \eta \frac{\sigma}{\tau f^2} \left\{ \frac{\pi(NA)^2}{hc\lambda} \right\}^2 \langle P \rangle^2 e^{-2z/l_s^{exc}}$$

$\eta$ : fluorophore quantum efficiency  
 $\sigma$ : two photon absorption cross-section  
 $\tau$ : laser pulse duration  
 $f$ : pulse repetition rate  
NA: Objective numeric aperture  
 $h$ : Planck's constant  
 $c$ : Speed of light  
 $\lambda$ : Excitation wavelength  
P: Average excitation power  
 $z$ : Sample depth  
 $l_s^{exc}$ : tissue scattering length

For estimating the number of photons in our case, we assumed that the sample is at depth 0, thus allowing us to neglect scattering effects, and the equation is simplified to:

$$F_{gen} = \eta \frac{\sigma}{\tau f^2} \left\{ \frac{\pi(NA)^2}{hc\lambda} \right\}^2 \langle P \rangle^2$$

As a typical example, for the fluorescent protein tdTomato and using the following probe and laser parameters:

$\eta$ : 0.69;  
 $\sigma$ : 108 GM =  $108 \times 10^{-50} \text{ cm}^4 \cdot \text{s} / \text{photon}$ ; based on (2,3)  
 $\tau$ : 100 fs =  $100 \times 10^{-15} \text{ s}$   
 $f$ : 80 MHz =  $80 \times 10^6 \text{ s}^{-1}$   
NA: 1.0  
 $hc$ :  $1.986 \times 10^{-25} \text{ J} \cdot \text{m} / \text{photon}$   
 $\lambda$ : 1050nm =  $1050 \times 10^{-9} \text{ m}$   
P: 10 mW =  $10 \times 10^{-3} \text{ J/s}$



We obtain

$$F_{gen} = 0.69 \times \frac{108 \times 10^{-50} \text{ cm}^4 \text{ s/photon}}{100 \times 10^{-15} \text{ s} (80 \times 10^6 / \text{s})^2} \left\{ \frac{3.14 \times (1.0)^2}{1.986 \times 10^{-25} \text{ J} \cdot \text{m/photon} \times 1050 \times 10^{-9} \text{ m}} \right\}^2 (10 \times 10^{-3} \text{ J/s})^2$$

$$= 0.263 \text{ photons}$$

Thus, the total number of photons generated in each pulse is:

$$F_{total} = F_{gen} \times V_{focal} \times C_{fluo} \times A$$

$V_{focal}$ : Focal volume

$C_{fluo}$ : Fluorophore concentration

A: Avogadro's constant,  $6.02 \times 10^{23}$  molecules/mol

The focal volume is approximately  $0.5 \text{ fL} = 0.5 \times 10^{-15} \text{ L}$ . A more comprehensive calculation of the focal volume is performed in **Supplementary Figure 4**.

The expression of exogenous proteins reaches a concentration of  $\sim 5 \mu\text{M}$  (4).

Therefore, we can estimate:

$$F_{total} = F_{gen} \times 0.5 \times 10^{-15} \text{ L} \times 10 \times 10^{-6} \frac{\text{Mol}}{\text{L}} \times 6.02 \times \frac{10^{23}}{\text{Mol}}$$

$$= 3.11 \times 10^3 F_{gen} \approx 0.8 \times 10^3 \text{ Photons/pulse}$$

Total photon flux per second is:

$$F_{flux} = F_{total} \times f = 0.8 \times \frac{10^3 \text{ Photons}}{\text{pulse}} \times 80 \times \frac{10^6 \text{ pulse}}{\text{s}} = 6.4 \times 10^{10} \text{ photons/s}$$

At a wavelength of 600 nm, a single photon has an energy  $E_p = \frac{hc}{\lambda} = \frac{1.986 \times 10^{-25} \text{ J} \cdot \text{m}}{600 \times 10^{-9} \text{ m}} = 0.331 \times 10^{-18} \text{ J}$

Assuming the fluorescent light source is inside of a cell with spherical shape and  $5 \mu\text{m}$  diameter, the total surface area will be:  $S = 4 \times \pi \times (2.5 \times 10^{-6})^2 = 0.785 \times 10^{-10} \text{ m}^2$

And the estimated fluorescence intensity is  $F_{flux} \times E_p / S = 6.4 \times 0.331 / 0.785 \times 10^2 \text{ W/m}^2 = 2.698 \times 10^2 \times 10^3 \times 10^{-6} = \mathbf{0.27 \text{ mW/mm}^2}$ .

In contrast, for the fluorescent protein **tagBFP**, the estimated fluorescence intensity at 10 mW two-photon excitation power would be **0.029 mW/mm<sup>2</sup>**. This fluorescence irradiance is about two order of magnitude lower than what is required for one-photon stimulation of ChR2 (5,6).

## Supplementary Note 2:

To estimate the spatial specificity of two-photon excitation fluorescence transfer (TEFT)-mediated stimulation, we assumed a simple geometric model of fluorescence emission. In this model, fluorescence only emerges from the volume of the cell targeted by the laser beam. The total flux through any spherical surface enclosing the fluorescence emission volume is the same. The surface of the assumed target cell can be considered to be one of these spherical surfaces and 100% of the fluorescent emission will pass opsins in the plasma membrane of target cell thereby potentially stimulating them. In contrast, only a cone of the original spherical emission sphere will irradiate a neighboring cell. The cone base is the cross-section of the neighboring cell and can be estimated as shown in the graph:

The proportion of energy received by the target cell and neighbor cell is the ratio of the total illumination area to the cap area of the spherical cone that covers the neighbor cell (the radius of the target cell and neighbor cell is set at  $r = 5\mu\text{m}$ , the distance between the cells is  $d$ ):

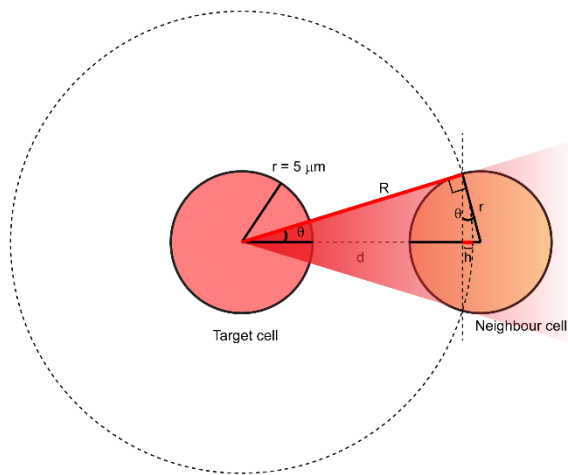

$$\begin{aligned} \text{Illumination ratio} &= \frac{\text{Spherical cone cap area}}{\text{Total sphere area}} \\ &= \frac{2\pi R h}{4\pi R^2} = \frac{h}{2R} \\ h &= R - R \cos \theta = R(1 - \cos \theta) \end{aligned}$$

$$\text{Thus, Illumination ratio} = \frac{1 - \cos \theta}{2}$$

$$\theta = \sin^{-1} \frac{r}{2r+d} = \sin^{-1} \frac{5}{10+d}$$

For example, when  $d = 0$ , the two cells are attaching to each other,  $\theta = 30^\circ$ ,  $\cos \theta = 0.86625$ , therefore the ratio is 0.067, 6.7%.

And with different  $d$  value, we plotted the illumination ratio.

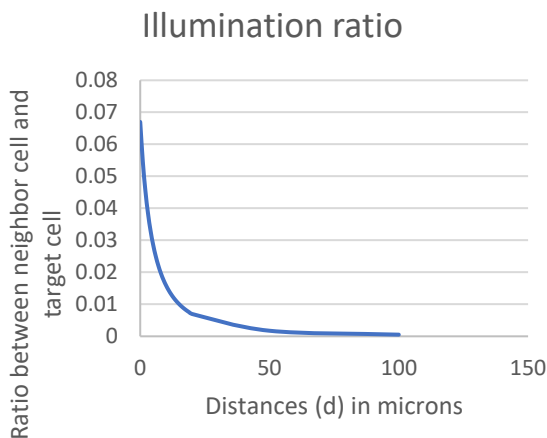

We think this simple geometric factor is sufficient to estimate the specificity since the absorption of light by brain tissue is negligible at this distance. In addition, if we assume a homogenous brain tissue, then the scattering effect of the light is also negligible in this case.

### Supplementary note 3:

In some cases, the DNA sequences encoding the target proteins (tagBFP, tdTomato and ReaChR) were cloned from the original constructs into an AAV-CAG backbone (the backbone was acquired from Addgene #28014, deleting the GFP sequence), and the resulted plasmids were used for in utero electroporation. Standard molecular cloning procedures were performed using the following reagents: Phusion High-Fidelity DNA Polymerase (New England BioLabs, M0530S), Restriction enzymes (New England BioLabs), T4 DNA ligase (ThermoFisher Scientific, EL0011), QIAGEN plasmid Maxi kit (#12162). All modified constructs were sequenced to verify the correct insertion and sequence. The modified plasmid maps are showed below:

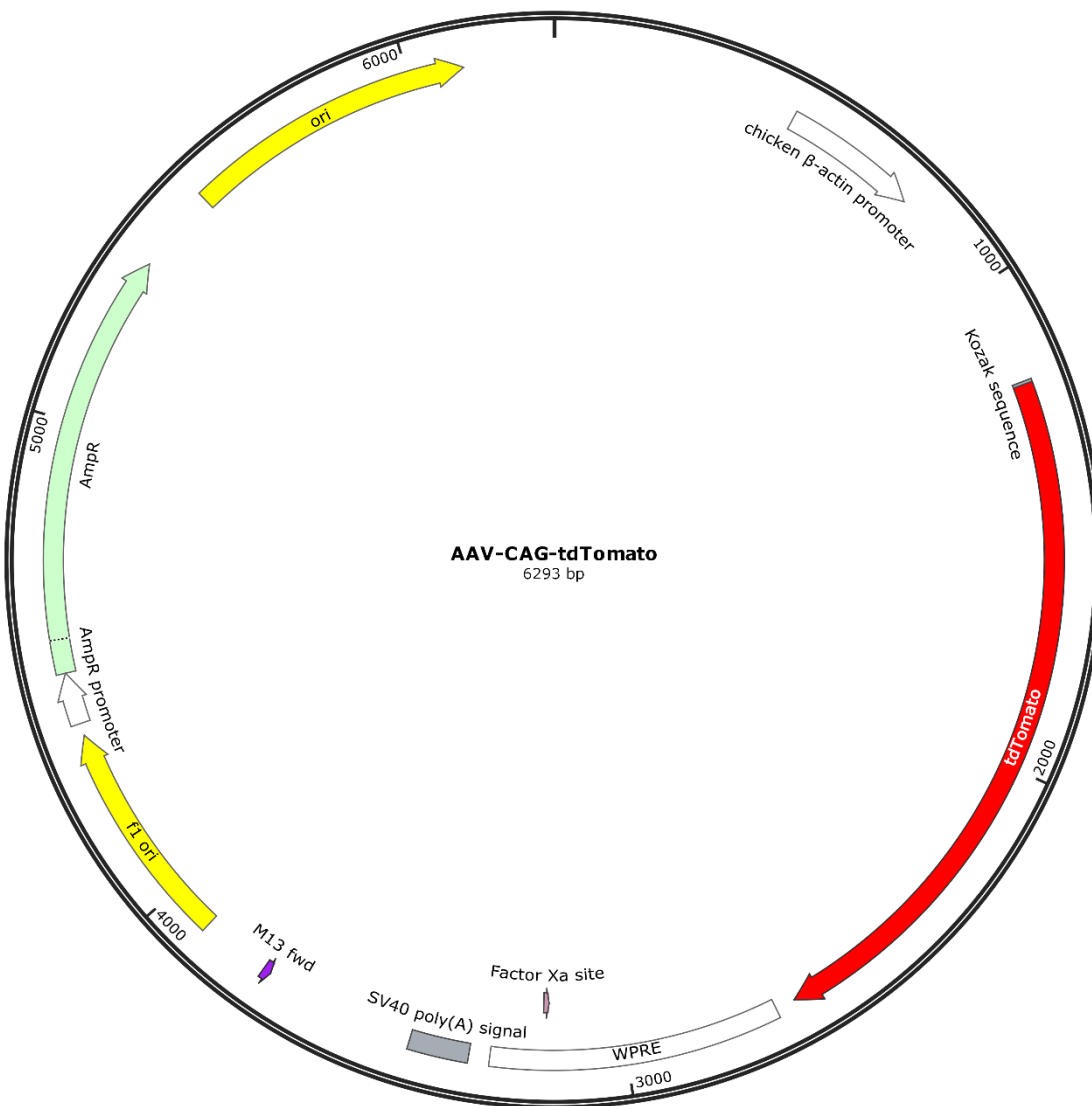

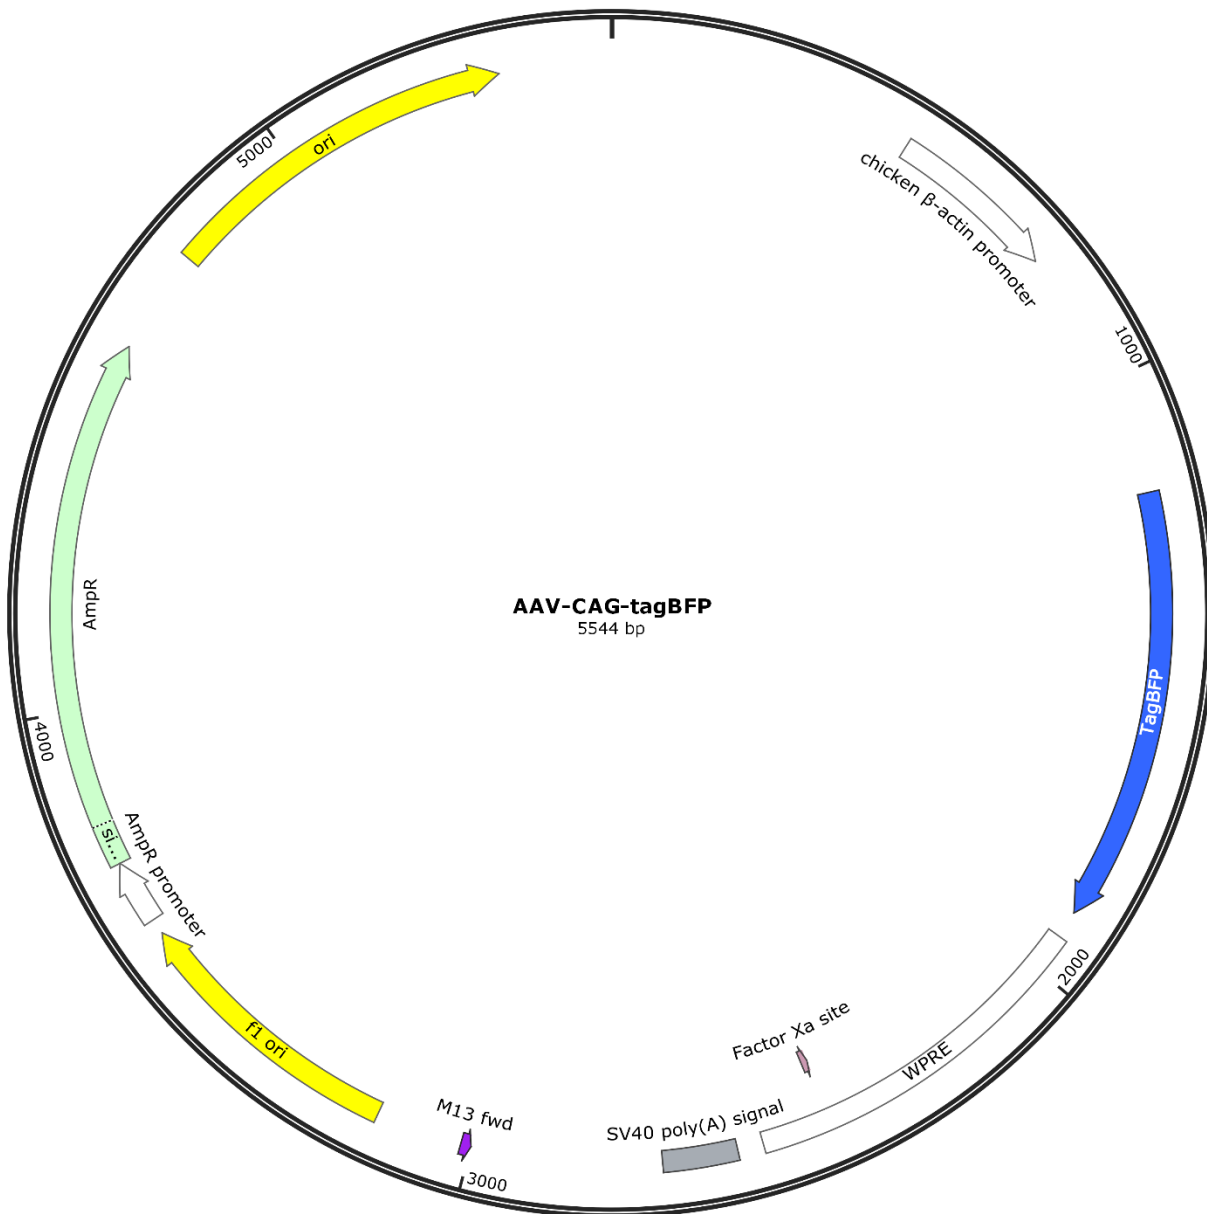

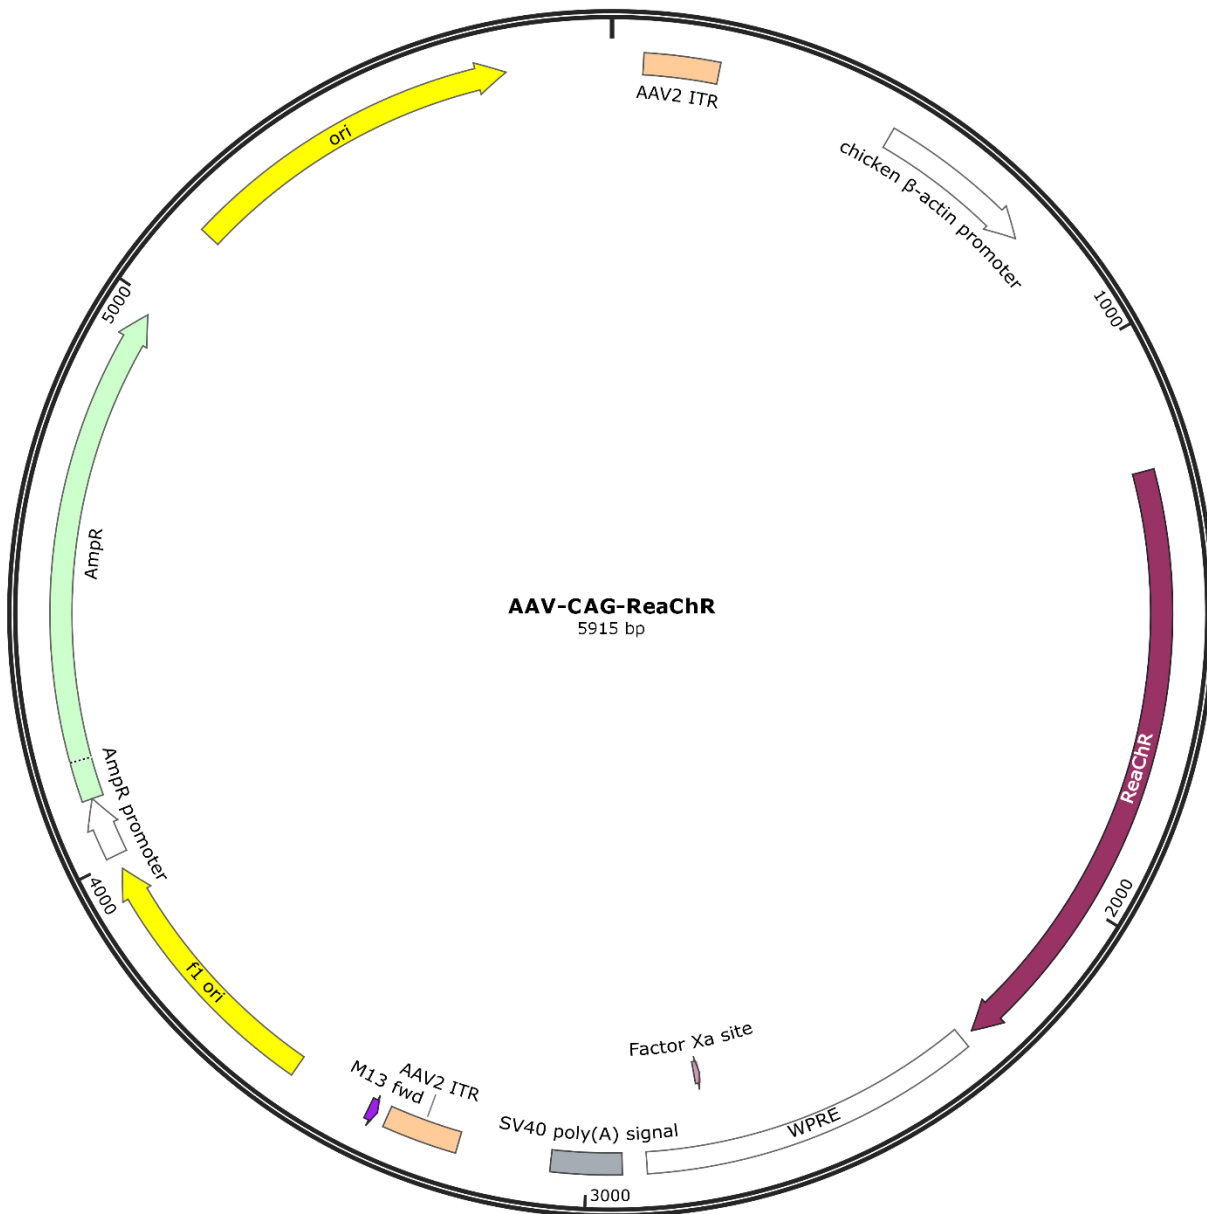

## References

1. Denk W, Strickler JH, Webb WW. Two-photon laser scanning fluorescence microscopy. *Science*. 1990 Apr 6;248(4951):73–76.
2. Drobizhev M, Tillo S, Makarov NS, Hughes TE, Rebane A. Absolute two-photon absorption spectra and two-photon brightness of orange and red fluorescent proteins. *J Phys Chem B*. 2009 Jan 29;113(4):855–859.
3. Drobizhev M, Makarov NS, Tillo SE, Hughes TE, Rebane A. Two-photon absorption properties of fluorescent proteins. *Nat Methods*. 2011 May;8(5):393–399.
4. Cherkas V, Grebenyuk S, Osypenko D, Dovgan AV, Grushevskiy EO, Yedutenko M, et al. Measurement of intracellular concentration of fluorescently-labeled targets in living cells. *PLoS ONE*. 2018 Apr 25;13(4):e0194031.
5. Lin JY. A user's guide to channelrhodopsin variants: features, limitations and future developments. *Exp Physiol*. 2011 Jan;96(1):19–25.
6. Lin JY, Lin MZ, Steinbach P, Tsien RY. Characterization of engineered channelrhodopsin variants with improved properties and kinetics. *Biophys J*. 2009 Mar 4;96(5):1803–1814.
